# Supplementary material for: Contact-Dependent Growth Inhibition Proteins in Acinetobacter baylyi ADP1
Source: PubMed Central journal article supplement (PMC6182759; doi:10.1007/s00284-018-1540-y), 2018-07-17
Supplement: 284_2018_1540_MOESM1_ESM.pdf [file 284_2018_1540_MOESM1_ESM.pdf]

**Table S1:** Oligonucleotide primers used in the study.

| Primer name        | Sequence (5' to 3')                         | Application                          |
|--------------------|---------------------------------------------|--------------------------------------|
| Up Fw 940-ΔNH2     | CTGTAGCAGGTGCCAGTCAA                        | Construction of the 940-ΔNH2 mutant  |
| Up Rv 940-ΔNH2     | CCCAGCTGGCAATTCCGGTGAAAATCTTGCTCAAACGATTC   |                                      |
| Dw Fw 940-ΔNH2     | CTTGACGAGTTCTTCTGAATTGACATTACGGCAGAGCAA     |                                      |
| Dw Rv 940-ΔNH2     | TATTCAGGCTACCCGCTTTG                        |                                      |
| Nest Fw 940-ΔNH2   | TTTAAGCGGCAATTTGACCTAC                      |                                      |
| Nest Rv 940-ΔNH2   | GCTTTGAGTTGCAAGGTTCC                        |                                      |
| C Fw 940-ΔNH2      | GAATCGTTTGAGCAAGATTTTCA                     |                                      |
| C-wt Rv 940-ΔNH2   | TGACCATCTGCCTGACTTTG                        |                                      |
| C-del Rv 940-ΔNH2  | TTGCTCTGCCGTAATGTCAA                        |                                      |
| Up Fw Δ941         | GTGCTGAGAATTTAGCAAAAAGC                     | Construction of the Δ941 mutant      |
| Up Rv Δ941         | CCCAGCTGGCAATTCCGGTCATGCTGCTGCTCATTGAATTTG  |                                      |
| Dw Fw Δ941         | CTTGACGAGTTCTTCTGAATGGGTGGATAAAGGTAGATTAGGA |                                      |
| Dw Rv Δ941         | CAGGCCCTTTAAAATCAACAA                       |                                      |
| Nest Fw Δ941       | CGTGGAATGGAATCACAAGA                        |                                      |
| Nest Rv Δ941       | TGCAATTTTGGCACCTGATA                        |                                      |
| C Fw Δ941          | GATTTACAGGGCCAGTACGTT                       |                                      |
| C-wt Rv Δ941       | CATCATTTTGGAAAGCGATGA                       |                                      |
| C-del Rv Δ941      | AATCATGCGAAACGATCCTC                        |                                      |
| Up Fw Δ940         | CTGTAGCAGGTGCCAGTCAA                        | Construction of the Δ940 mutant      |
| Up Rv Δ940         | CCCAGCTGGCAATTCCGGTGAAAATCTTGCTCAAACGATTC   |                                      |
| Dw Fw Δ940         | CTTGACGAGTTCTTCTGAATGGGTGGATAAAGGTAGATTAGGA |                                      |
| Dw Rv Δ940         | CAGGCCCTTTAAAATCAACAA                       |                                      |
| Nest Fw Δ940       | TTTAAGCGGCAATTTGACCTAC                      |                                      |
| Nest Rv Δ940       | TGCAATTTTGGCACCTGATA                        |                                      |
| C Fw Δ940          | GAATCGTTTGAGCAAGATTTTCA                     |                                      |
| C-wt Rv Δ940       | TTGCTCTGCCGTAATGTCAA                        |                                      |
| C-del Rv Δ940      | CAGGTCGGTCTTGACAAAAAG                       |                                      |
| Up Fw 2784-ΔNH2    | TATCGGTGCCTTAGGACTCA                        | Construction of the 2784-ΔNH2 mutant |
| Up Rv 2784-ΔNH2    | CCCAGCTGGCAATTCCGGAGTGGCTTAATAGCTGTAGTTCAAG |                                      |
| Dw Fw 2784-ΔNH2    | CTTGACGAGTTCTTCTGAAGCTCGAAGCAGGAGGTACAC     |                                      |
| Dw Rv 2784-ΔNH2    | TGAGACAATGCTCCAAGTGC                        |                                      |
| Nest Fw 2784-ΔNH2  | AAGTCCAGCGCAGAATCACT                        |                                      |
| Nest Rv 2784-ΔNH2  | AGCATAATCCCCATCACAA                         |                                      |
| C Fw 2784-ΔNH2     | CATGGGCAGTGTATTTGGTG                        |                                      |
| C-wt Rv 2784-ΔNH2  | CAGGAATGGATTGGCTCCTA                        |                                      |
| C-del Rv 2784-ΔNH2 | GCCTCGTCTTGACAGTTCATT                       |                                      |
| Up Fw Δ2783        | GCTTTAATGGTCCGACTCCA                        | Construction of the Δ2783 mutant     |
| Up Rv Δ2783        | CCCAGCTGGCAATTCCGGTCAGGCCGAGTATTTACGTCAT    |                                      |
| Dw Fw Δ2783        | CTTGACGAGTTCTTCTGAATTTGACGGGTATTCTGAGGTC    |                                      |
| Dw Rv Δ2783        | AGCCTGAAGTGCTGACACCT                        |                                      |
| Nest Fw Δ2783      | TGTTGTCCGGTGCATTAGGAG                       |                                      |
| Nest Rv Δ2783      | CATTGGCTTCCCTGAGTTGT                        |                                      |
| C Fw Δ2783         | TGCTGGGGTAGGAGAAATTG                        |                                      |
| C-wt Rv Δ2783      | GGCTTTTTAGTTGCCGCATA                        |                                      |
| C-del Rv Δ2783     | TGCTGTGTGCCCCAGTCAT                         |                                      |
| Up Fw Δ2784        | TATCGGTGCCTTAGGACTCA                        | Construction of the Δ2784 mutant     |
| Up Rv Δ2784        | CCCAGCTGGCAATTCCGGAGTGGCTTAATAGCTGTAGTTCAAG |                                      |
| Dw Fw Δ2784        | CTTGACGAGTTCTTCTGAATTAGAAAATCATAGGATTATTGTG |                                      |
| Dw Rv Δ2784        | TTTGGAACACTAAATACTCCCC                      |                                      |
| Nest Fw Δ2784      | AAGTCCAGCGCAGAATCACT                        |                                      |
| Nest Rv Δ2784      | TTTGGAACACTAAATACTCCCC                      |                                      |
| C Fw Δ2784         | CATGGGCAGTGTATTTGGTG                        |                                      |
| C-wt Rv Δ2784      | CAGGAATGGATTGGCTCCTA                        |                                      |
| C-del Rv Δ2784     | TATTTGTACGAATGGGTGTGCT                      |                                      |

|                        |                                         |                                          |
|------------------------|-----------------------------------------|------------------------------------------|
| Up Fw $\Delta 2866$    | GGTGTGGTTTGTGGGTAGG                     | Construction of the $\Delta 2866$ mutant |
| Up Rv $\Delta 2866$    | CCCAGCTGGCAATTCCGGATGCACCCAATCCCTAACATT |                                          |
| Dw Fw $\Delta 2866$    | CTTGACGAGTTCTTCTGAAAGATGGCAGTGCTGGTCATA |                                          |
| Dw Rv $\Delta 2866$    | CCGCAAATCTGGCAATAACT                    |                                          |
| Nest Fw $\Delta 2866$  | GAAGATGCGTATGGCAATGA                    |                                          |
| Nest Rv $\Delta 2866$  | CTCCACACAAGATGATGCAC                    |                                          |
| C Fw $\Delta 2866$     | AATGTTAGGGATTGGGTGCAT                   |                                          |
| C-wt Rv $\Delta 2866$  | TTGCTTGCATAGAGCAATGG                    |                                          |
| C-del Rv $\Delta 2866$ | TGTCTGTTGTGCCAGTCAT                     |                                          |
| KmFw                   | CCGGAATTGCCAGCTGGG                      | Kanamycin amplification                  |
| KmRv                   | TTCAGAAGAAGACTCGTCAAG                   |                                          |
| RT Fw 940              | GGTGCCATCCTCAATAATGC                    | RT-PCR for <i>cdiA940</i> detection      |
| RT Rv 940              | TGGCTTACCTTTGGCTAAC                     |                                          |
| RT Fw 2784             | TAGGAGCCAATCCATTCCTG                    | RT-PCR for <i>cdiA2784</i> detection     |
| RT Rv 2784             | CCTGCAACTTCCAGATTCC                     |                                          |
| RT Fw 2866             | ATTGGAGCAGGATCGCATAG                    | RT-PCR for <i>bap</i> detection          |
| RT Rv 2866             | AGTACGCTTTGGATCGATGG                    |                                          |
| 16S Fw                 | ATGGTCGGTACAAAGGGTTG                    | RT-PCR for 16S rRNA detection            |
| 16S Rv                 | TTCATGGAGTCGAGTTGCAG                    |                                          |
