# Supplementary material for: Contact-Dependent Growth Inhibition Proteins in Acinetobacter baylyi ADP1
Source: PubMed Central journal article supplement (PMC6182759; doi:10.1007/s00284-018-1540-y), 2018-07-17
Supplement: 284_2018_1540_MOESM2_ESM.pdf [file 284_2018_1540_MOESM2_ESM.pdf]

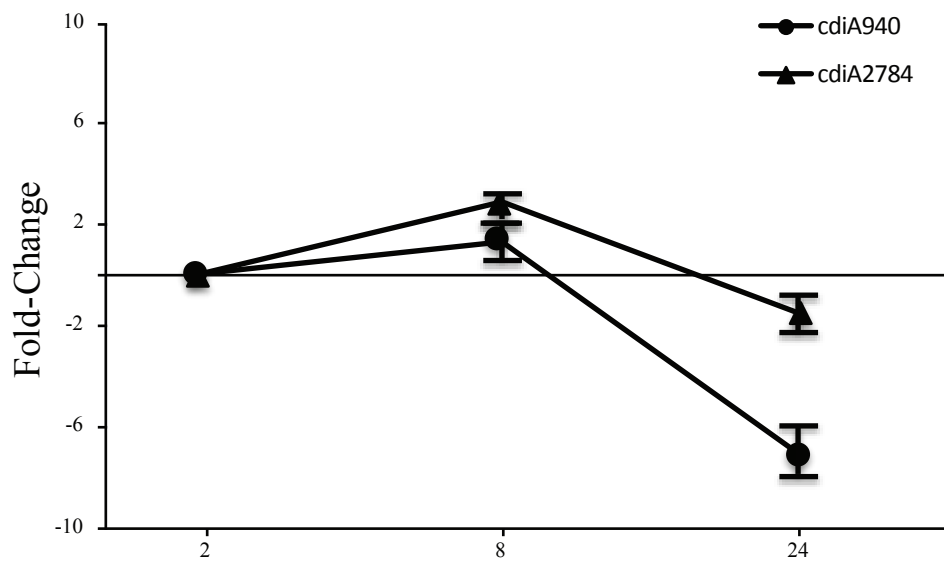

Figure S1. Changes of *cdiA* gene expression in *A. baylyi* ADP1 cells, grown at 30°C in LB broth, at 2, 8 and 24 hr as determined by qRT-PCR, using the relative quantitative method ( $\Delta\Delta\text{CT}$ ). Data shown are averages obtained from triplicate cultures. The error bars represent standard deviations.
