# Supplementary material for: Contact-Dependent Growth Inhibition Proteins in Acinetobacter baylyi ADP1
Source: PubMed Central journal article supplement (PMC6182759; doi:10.1007/s00284-018-1540-y), 2018-07-17
Supplement: 284_2018_1540_MOESM3_ESM.pdf [file 284_2018_1540_MOESM3_ESM.pdf]

**Supplementary file S2.** Alignment of the CT regions of CdiA2784 (panel A) and CdiA940 (panel B) to homologous regions found in *A. baumannii* proteins. Dots denote identities.

**A CdiA2784**

```
ADP1      YAGYDVNTAANSADIAIQNN SLVKLATSTGKILVKTLDDEFNLRKAGKQVTKDDLVT5FKKOGADELIGIADLLTVFGRSSSSFDRALAAIDLIVGTDLKPKGESLKIAKNELEKLEKLTDRSYVQTVYQNKID
554S     YTGVDVNTAANSADTAIQNN .....V.....Y.....A.L.E.S.....T.....M.....V.....L.S.....V.
NIPH146  YTGVDVNTAANSADTAIQNN .....V.....Y.....A.L.E.S.....T.....M.....V.....L.S.....V.
LUH7841  YTGVDVNTAANSADTAIQNN .....V.....Y.....A.L.E.S.....T.....M.....V.....L.S.....V.
CIP70.10 YTGVDVNTAANSADTAIQNN .....V.....Y.....A.L.E.S.....T.....M.....V.....L.S.....V.
          PT-VENN module
```

```
ADP1 2784 VITRNRLNGKEFETSAAASKLGIQRNTRDQMIVTKTERDGGQINIIPDAFGNGGTLVEFKNLKYITDTKQFRGYAATKPKVTLVINPDTKYSSSTIENTIRDSKGIYTFDOTTQKLVKDFRKS
554SV -V...M.....V.....VK.....I.....VQ.L.....L.....G...S..V.MN..I.E.VK.N.LSN..T.QR..PIK.T.HPY
NIPH146 .V...M.....V.....VK.....I.....VQ.L.....L.....G...S..V.MN..I.E.VK.N.LSN..T.QR..PIK.T.HPY
LUH7841 .V...M.....V.....VK.....I.....VQ.L.....L.....G...S..V.MN..I.E.VK.N.LSN..T.QR..PIK.T.HPY
CIP70.10 .V...M.....V.....VK.....I.....VQ.L.....L.....G...S..V.MN..I.E.VK.N.LSN..T.QR..PIK.T.HPY
```

**B CdiA940**

```
ADP1      ASLKFANEVQKD KOGAEYLINAASGIIVGGIAKGTVKNNNSDIDISKSGFEIGNINPITGHKILGTHKDESNNTVGNVIVEGTPSTKDKVIKTDIQ
NIPH146  NYEESLSELSSS .....A..V.....G..A.....
CIP70.10 NYEESLSELSSS .....A..V.....G..A.....
LUH7841  NYEESLSELSSS .....A..V.....G..A.....
```

```
YYENPGHHDPKGGNQIGYKTKSVLPDNNHKNLWDNSIVASDGNRWAWEVINGKKVYHRFQNDGNGNFHWNSTNGKTAGVDVSDVSKIPPEILRK
.....T.....G.....
.....T.....G.....
.....T.....G.....
```
